# Supplementary material for: Evolution of nonstop, no-go and nonsense-mediated mRNA decay and their termination factor-derived components
Source: PubMed Central journal article supplement (PMC2613156; doi:10.1186/1471-2148-8-290), 2008-10-23
Supplement: 1471-2148-8-290-S1.pdf [file 1471-2148-8-290-S1.pdf]

|                                                    |                                      |
|----------------------------------------------------|--------------------------------------|
| Eur_Thermococcus_kodakarensis_57641174             | GGLGAILRYKIQ                         |
| Eur_Pyrococcus_furiosus_18977965                   | GGLGAILRFRIQGV                       |
| Eur_Methanococcoides_burtonii_91773686             | GGVVAILRFNTGI                        |
| Eur_Methanosarcina_mazei_21227449                  | GGIAAILRYNTGV                        |
| Eur_Haloquadratum_walsbyi_110669122                | GGIAGILRYATGI                        |
| Eur_Natronomonas_pharaonis_76800790                | GGIAGILRYSTGV                        |
| Eur_Methanospirillum_hungatei_88604069             | GGIAAILRYRTGY                        |
| Eur_Archaeoglobus_fulgidus_11498819                | GGIAAILRFKPDGGQ                      |
| Eur_Thermoplasma_volcanium_13541419                | GGLAAVLRFRKDNVQNV                    |
| Eur_Ferroplasma_acidarmanus_126008273              | GGLAGILRYVPENQJNI                    |
| Na_Nanoarchaeum_equitans_41614848                  | -GIAAFLYYASE                         |
| Cr_Methanothermobacter_thermautotrophicus_15678898 | GGIGAILRYRP                          |
| Cr_Methanocaldococcus_jannaschii_15669016          | KGIAAILRYKIHQ                        |
| Cr_Cenarchaeum_symbiosum_118194995                 | GKVAAILRYNPGY                        |
| Cr_Hyperthermus_butylicus_124028078                | KGLVGVLFHFRIM                        |
| Cr_Aeropyrum_ernex_118431680                       | GGLAGILRFRTSTV                       |
| Cr_Sulfolobus_solfataricus_15899097                | NGIVGKLRRLY                          |
| Cr_Caldivirga_maquilingensis_126354816             | GGYVAILATPSWIIIEWENASQSLTQ           |
| Cr_Pyrobaculum_aerophilum_18313678                 | GGYVALLSTPVVWLEQQLSIAEAAQR           |
| Cr_Pyrobaculum_islandicum_119871817                | GGYVALLSTPVVWLEQQIQAEAA              |
| Cr_Pyrobaculum_arsenaticum_145591216               | GGYVALLSTPVVWLEQQIAAEATTTT           |
| Cr_Pyrobaculum_calidifontis_126458978              | GGFVALLNAPSWLLEQQQTAQA               |
| Euk_Homo_sapiens_4759034                           | GGIGGILRYRVDFQGMFYQGGDEFFDLDDY       |
| Euk_Arabidopsis_thaliana_15222115                  | GGIGGMLRYQLDMRTFDELSDTVEYEDSD        |
| Euk_Saccharomyces_cerevisiae_468605                | GGIGAMLRKVNFEQLVDESEDEYDEDEGS        |
| Euk_Dictyostelium_Discoideum_66805833              | GGLGGLLRQVDFALNDFDNFDENEYDSDSDF      |
| Euk_Plasmodium_falciparum_124801199                | GGFGGMLRYKIDLNLYDEDVESDVELF          |
| Euk_Giardia_lamblia_71080536                       | GGIGGLLRWQVDLVEAARFMQESDEDSFMDDLEDFI |
