# Supplementary material for: Evolution of nonstop, no-go and nonsense-mediated mRNA decay and their termination factor-derived components
Source: PubMed Central journal article supplement (PMC2613156; doi:10.1186/1471-2148-8-290), 2008-10-23
Supplement: 1471-2148-8-290-S2.pdf [file 1471-2148-8-290-S2.pdf]

aRF1\_Eur\_Thermococcus\_57641174  
aRF1\_Eur\_Pyrococcus\_18977965  
aRF1\_Eur\_Methanococcoides\_91773686  
aRF1\_Eur\_Methanosarcina\_21227449  
aRF1\_Eur\_Archaeoglobus\_11498819  
aRF1\_Eur\_Methanothermobacter\_15678898  
aRF1\_Eur\_Methanocaldococcus\_15669016  
aRF1\_Eur\_Haloquadratum\_110669122  
aRF1\_Eur\_Natronomonas\_76800790  
aRF1\_Cr\_uncultured\_crenarcheote\_68445547  
aRF1\_Cr\_Cenarchaeum\_118194995  
aRF1\_Cr\_Hyperthermus\_124028078  
aRF1\_Cr\_Sulfolobus\_15899097  
aRF1\_Cr\_Aeropyrum\_118431680  
aRF1\_Cr\_Caldivirga\_126354816  
aRF1\_Cr\_Pyrobaculum\_18313678  
aRF1\_Na\_Nanoarchaeum\_41614848  
eRF1\_Euk\_Homo\_4759034  
eRF1\_Euk\_Arabidopsis\_15222115  
eRF1\_Euk\_Dictyostelium\_6680583  
eRF1\_Euk\_Plasmodium\_124801199  
eRF1\_Euk\_Saccharomyces\_468605  
eRF1\_Euk\_Giardia\_71080536  
eDom34p\_Euk\_Saccharomyces\_6324327  
eDom34p\_Euk\_Homo\_31880783  
eDom34p\_Euk\_Arabidopsis\_30687676  
eDom34p\_Euk\_Dictyostelium\_66814004  
eDom34p\_Euk\_Plasmodium\_124511978  
eDom34p\_Euk\_Giardia\_71070449  
aDom34p\_Eur\_Pyrococcus\_18977751  
aDom34p\_Eur\_Archaeoglobus\_11498443  
aDom34p\_Eur\_Natronomonas\_76802806  
aDom34p\_Cr\_Aeropyrum\_118431599  
aDom34p\_Cr\_Caldivirga\_126353378  
aDom34p\_Cr\_Cenarchaeum\_118194730  
aDom34p\_Na\_Nanoarchaeum\_41614904

EVRKALELG--AVDKLLISEGYDKVVRVRAKCNNGWEELKIM--SEGEFVAVKKQL--THCPKCGSQNITFEKMDVAEELIKMAEESGADVEIISLDTEEGQQ  
EVRKALELG--AVDILLISEGYDKVVRVRAKCNNGWEELKIM--SEEEYFAYKKRI--QTCPCGSSQNTFEKMDVAEELIKMAEESGADVEIISLDTEEGQQ  
NVRNLIIG--AVDILLISEDLRAVREIVKCTSCDYBQKTSR--EF---KPGDSSSPTGNCPCGSSYLEITEKVDVVDQLSEICDMGTRVEFISTDFEFGSQ  
QVRANLEIN--SVDVLLISEDLRAERVTIKCSVCGYENKWR--RW---KPGEPAPAAAGNCPKCGSSLEIVDVIDVEFSELAADKSNKAKWVSTDFDEGSGQ  
EVRRYIEIG--AVDILLISEDLRVERVYKRCPCGKGEVEVIV--RE---GIEKPPFCEEDNVMEVEVRRDIVLESELAESTGAKVFLSTSESEGFEM  
EVRQHLMG--AVEVLLISEDLKIQRGTYECASGHRMEKIG--RD-----LPDTETCPSCNDQMRSLDRRMDIDDLVEMAEVGVTEVEIISTETEBGQ  
EVLKALMMG--AVDTLIVSELEKYKVKIACNNCDYLEEKIV--NKLELIKLEBELKVAQCPKCGGALSIVEEKDYIEYLSSELCEQSGAKLVIVSSSETEGAM  
PIRKNLMMG--AVDRLLISEDLRSVWVYECPCDGHHEVEVID--RR-----HDDPEHTCSDCGSASEKTEREDVIEYIMSTAEQRTETIKFISTDFEFGSQ  
ATRQNLMMG--SVDRLISEDLRKDWTFDC--GSREYELLD--RR-----ADTDFHTCED--GSEGEAVEREDAIDHIMELAEQRGSDVKFISTDFEFGSQ  
DVINAALSG--VADIVLVNDINRVRVWVVKRCVAREERIV--SMDKAIQVKQEMISSACSKSSIDYDVEYDQLEIEMDELAMTIGARVEISSSTEDGKM  
EVSDDLDRN--WETLLITDDANLHRVEAKRCRCGNVQDQIV--EGPRVIVPRTGMLGAPCPCSNSTDLSEASQRDWDYFGLVAARKNGAKLEIVISGKAEHGM  
MVKTALEMG--ALKVIIVDEERP-----ADTLAEAKKYGTIKVYFLSGDLPEAEW  
QIKKAMEIG--AIEAIVIHEDSTDK-----LEKLAQDAENYGVKVFVWGVDEPEAEW  
DVEAALEMG--AVKTLIHESRED-----LEEWKAKSSQAQVIVVPELAEAEW  
NVLNAIEKG--IAKVLITSEDIGE-----DEIFKLTITMLRCKIDLWVINSVEESLT  
RALKALEMG--IADIIVIAEELGE-----DAVLEIVMKAEEKIKVVEVPRGVESKT  
EVKKYLEQG--LVQKIIVMEDPPK-----LDELLEAEKHNDVVEIIEGGITTEBQ  
DTLKALEMG--AVEILIVYENLDIMRYVLHQQTEEEKIL---YLFPEQEKDKSHFTD--KETGQEHHELIESMPLLEWFANNYKFGATLEIVTDKSGQEGSQ  
DTLKALEMG--AIEITLIVENLDINRYELKNSTTGEMVVK---HFGKQESDTSNFDH--SETNAELEVQEKMPLEWFANNYKFGCTLEIVTNKSGQEGSQ  
DTLKALDLG--AAHTLIVWESLETIRYLLRLP--TGEKVI---FLNKDQNKDASVEKD--KESGLDYEIVEEMPIVEWFANNYKFGASLEIVTNKSGQEGSQ  
DTLKALEIG--AVELLILYEGLDIIRLITIKNFVNTQIKIM--HISFCDEKQESLY---KENNVELEWEKISLTDWIGNKKYKASLDIVTNKSGQEGSQ  
DTLKALDLG--AVEKLVFENLETIRYTFKDAEDNE--VI---KFAEPEAKDKSFAID--KATGQEMDVVEEPLIEWLAANNYKFGATLEIFTDKSSBGAQ  
DITRCLMS--AVEKLVWDDLPYHRVTLQCVINGETSAPVKYLLKQMSNPKYLREVINGEVQLDITMIDQLLEWVFNKYNGASLEFTINRSABGTQ  
EVRKAAEYG--AISVLLIDKVLH-----SDNIAQREYVYKIMDSVENSGKALVLTSLHSLGEE  
QVEKANEAM--AIDTLLISDELFR-----HQDVATRSRVRVLDVSKENAGTIVRIFSSLHVSGBQ  
HVEVANERM--AIQTLITDELFR-----NSDVKTRKRVNIVSVKDSGGDAFIFSAMHVSGBQ  
HVKKANERL--AIEITLIVTDELFR-----CKDVKTRKRVNIVSVKDSGGDAFIFSAMHVSGBQ  
EVKYASKIN--AIDSLITDKTFR-----SCDVKTRKRVNIVSVKDSGGDAFIFSAMHVSGBQ  
DVLKILKTNPTALSTVLVSTVLSQ-----CRDLITRQIQEYM--AQHSNYIEFTEVTKTQTEPGKQ  
EVEEATNYG--AVEITLIVLDSLK-----GELREKIEELMELARVLRASVWVWVSEHEGGDK  
EVRKAHNYR--AIEVLLIVADEFL-----EEREKWDVVDGLLEVEESGGKRVIMSTEFEPGKR  
EVAEAAEFG--AIEITLITDELFR-----EERAGBGDVAVDNDLLENVEQGGVWVFSHEFDEPGQ  
EVLAVARMG--AVDVLVLDVLLH-----SPDDAVREAVDEALRLESMGVRGVIIPGDSFAGER  
EIVYALSMG--AVDSLMLDKLLI-----EKAEESSRIIDDCIRIRAKLIVPDCSEAGKL  
ETRAAAEAG--AIESLVFSDGLIS-----AAGEQQAVDFLNNAQATGAGIFGADSTIDAGLR  
EATEDIKIG--NVEEVYVIRDVYL-----RLKERKEEDLLNITLVLPPKYNKVIIEGDSDLAKQ
