# Supplementary material for: Evolution of nonstop, no-go and nonsense-mediated mRNA decay and their termination factor-derived components
Source: PubMed Central journal article supplement (PMC2613156; doi:10.1186/1471-2148-8-290), 2008-10-23

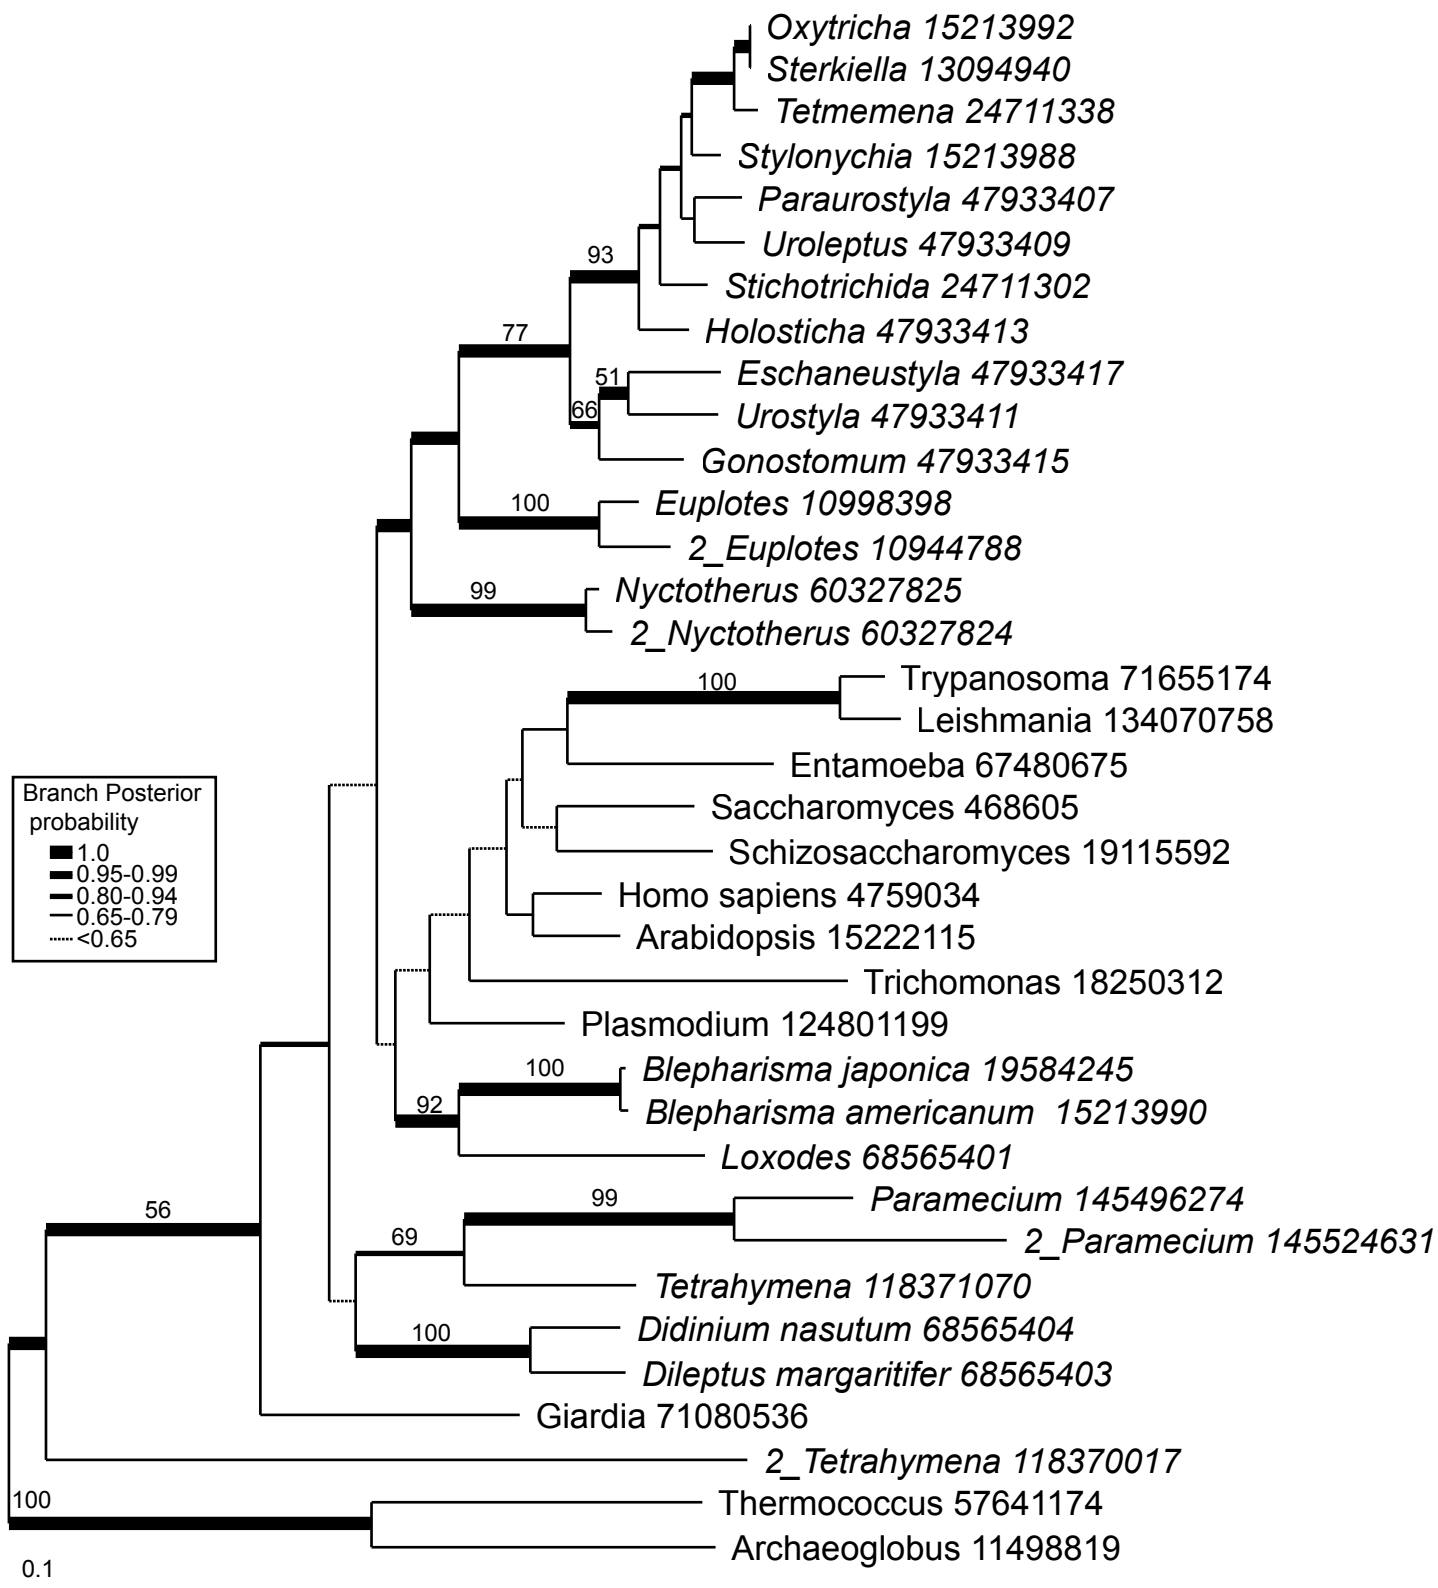

Supplement: 1471-2148-8-290-S5.pdf [file 1471-2148-8-290-S5.pdf]
